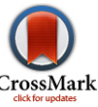

# Anti-HIV-1 Activity of Eight Monofloral Iranian Honey Types

Mandana Behbahani\*

Department of Biotechnology, Faculty of Advanced Sciences and Technologies, University of Isfahan, Isfahan, Islamic Republic of Iran

## Abstract

Monofloral Iranian honeys from eight floral sources were analyzed to determine their anti-HIV-1 activities as well as their effects on lymphocyte proliferation. The Peripheral Blood Mononuclear Cells (PBMCs) used in this study were prepared from five healthy volunteers who were seronegative for HIV, HCV, HBV and TB. The anti-HIV-1 activity of eight different honeys was performed by quantitative polymerase chain reaction (PCR) assay and high pure viral nucleic acid kit. The results demonstrated that monofloral honeys from *Petro selinum sativum*, *Nigella sativa*, *Citrus sinensis*, *Zataria multiflora*, *Citrus aurantium* and *Zizyphus mauritiana* flowers had potent anti-HIV-1 activity with half maximal effective concentration (EC<sub>50</sub>) values of 37.5, 88, 70, 88, 105 and 5 µg/ml respectively. However, monofloral Iranian honeys from *Astragalus gummifer* and *Chamaemelum nobile* flowers had weak anti-HIV-1 activity. The frequency and intensity of CD4 expression on PBMCs increased in the presence of all honey types. CD19 marker were also increased after the treatment with monofloral honeys from *Z.multiflora* and *N. sativa*. The anti-HIV-1 agent in monofloral honeys from *P.sativum*, *N. sativa*, *Z. multiflora* and *Z. mauritiana* flowers was detected by spectroscopic analysis as methylglyoxal. Time of drug addition studies demonstrated that the inhibitory effect of methylglyoxal is higher on the late stage of HIV-1 infection. The result demonstrated that methylglyoxal isolated from monofloral honey types is a good candidate for preclinical evaluation of anti-HIV-1 therapies.

**Citation:** Behbahani M (2014) Anti-HIV-1 Activity of Eight Monofloral Iranian Honey Types. PLoS ONE 9(10): e108195. doi:10.1371/journal.pone.0108195

**Editor:** Rizwan H. Khan, Aligarh Muslim University, India

**Received:** March 19, 2014; **Accepted:** August 24, 2014; **Published:** October 21, 2014

**Copyright:** © 2014 Mandana Behbahani. This is an open-access article distributed under the terms of the Creative Commons Attribution License, which permits unrestricted use, distribution, and reproduction in any medium, provided the original author and source are credited.

**Funding:** This work has been done in Isfahan University and supported by Isfahan University. The funders had no role in study design, data collection and analysis, decision to publish, or preparation of the manuscript.

**Competing Interests:** The author has declared that no competing interests exist.

\* Email: Ma\_behbahani@yahoo.com

## Introduction

The human immunodeficiency virus type 1 (HIV-1) is one of the most infectious agents causing disease and death through depletion of CD4 lymphocytes and immune-suppression [1]. Current anti HIV drugs have a lot of disadvantages including resistance, toxicity and limited availability. Many studies have been carried out worldwide to develop drugs that inhibit diverse steps of viral replication and improve immunologic parameters [2,3]. Natural products have been considered as potential anti-HIV drugs [4]. Some important secondary metabolites that are obtained from these products including alkaloids, flavonoids, sulphated polysaccharides, coumarines and triterpenes [5,6], have been described to inhibit different steps of viral replication such as reverse transcription process, virus entry and the integrase or protease activities [7,8]. Screening anti-HIV compounds from natural products may be one of the effective ways to discover new drugs. Honey is a tasty natural product which has been consumed for its high nutritive value and its role in human health. The value of honey is determined by its chemical and physical characteristics [9]. A diversity of secondary metabolites, minerals, proteins, free amino acids, enzymes, and vitamins have been obtained from this product [10]. Several biological activities of honey such as antioxidant and anti-bacterial have been previously investigated [11]. Recently, methylglyoxal has been documented as a potent antibacterial agent in manuka honey. However there is no report about anti-HIV-1 activity of methylglyoxal. Therefore, we became eager to assess Iranian species with respect to their anti-HIV-1

activity [12]. The anti-HIV potency of insect products derived from honey were also reported [13]. Al-Waili *et al.* demonstrated that natural honey decreased prostaglandins level and improved hematological and biochemical tests in a patient with AIDS [14]. Ethiopian multiflora honey were reported to treat resistant *Candida* strains in AIDS patients [15]. The composition of honey is dependent on its floral sources and environmental factors. The variation of honey composition may be responsible for different biological activities [16]. Honey production in Iran has very long traditions and it is famous for its quality. However, little information is available about biological activity of honey from different floral sources in Iran. Therefore, in the present study, the anti-HIV1 effects of eight different monofloral honeys and their effects on expression of lymphocyte activation markers have been studied.

## Materials and Methods

### Ethics statement

This study was approved by the Ethical Committee in Isfahan University, Iran. All participants were provided written informed consent to participate in the study. The written consents of participation were approved by Isfahan University.

### Honey samples

Monofloral honeys from eight floral sources were obtained from three different centers of Iran including Jihad-agricultural organization of Mazandaran, Fars Agricultural Organization

and National Center of Agriculture Research of Isfahan. The eight different floral sources were *Petro selinum sativum*, *Nigella sativa*, *Citrus sinensis*, *Zataria mmultiflora*, *Citrus aurantium*, *Zizyphus mauritiana*, *Astragalus gummifer* and *Chamaemelum nobile*. These samples were certified as monofloral by the National Center of Agricultural Research of Isfahan, Iran. Fresh honey samples weighing 50 g were packed and sealed in amber glass bottles and stored at 4°C in the dark.

### Extraction and isolation of compounds

Four monofloral Iranian honeys isolated from *P. sativum*, *N. sativa*, *Z. multiflora* and *Z. mauritiana* (5 g) were separately dissolved in 5 ml methanol and fractionated separately using silica-gel column chromatography. The methanol extracts were separately eluted with Hexane: Acetone: Methanol (10:0:0 – 0:0:10, v/v/v). The following fractions have been obtained from these monofloral Iranian honeys:

Fractions 1–24 from monofloral Iranian honeys isolated from *Z. mauritiana* (0.31, 0.22, 0.17, 0.21, 0.15, 0.13, 0.24, 0.19, 0.14, 0.24, 0.22, 0.35, 0.21, 0.14, 0.12, 0.11, 0.21, 0.22, 0.29, 0.14, 0.11, 0.24, 0.2, 0.21 g), *P. sativum* (0.21, 0.28, 0.21, 0.2, 0.2, 0.12, 0.17, 0.11, 0.19, 0.19, 0.13, 0.17, 0.18, 0.27, 0.21, 0.1, 0.11, 0.12, 0.11, 0.22, 0.24, 0.31, 0.33, 0.48 g), *N. sativa* (0.2, 0.10, 0.24, 0.26, 0.32, 0.19, 0.18, 0.14, 0.2, 0.19, 0.16, 0.2, 0.22, 0.19, 0.17, 0.21, 0.2, 0.22, 0.23, 0.21, 0.23, 0.15, 0.23, 0.16 g) and *Z. multiflora* (0.3, 0.31, 0.25, 0.17, 0.19, 0.17, 0.21, 0.2, 0.11, 0.17, 0.1, 0.21, 0.18, 0.17, 0.21, 0.1, 0.23, 0.2, 0.21, 0.15, 0.22, 0.23, 0.2, 0.22 g) were obtained. The anti-HIV-1 activity of all of the fractions was tested and the most active fractions were selected. Fractions 10, 12, 14 and 19 respectively from *N. sativa*, *Z. mauritiana*, *P. sativum* and *Z. multiflora* have been demonstrated to have potent anti-HIV-1 activity and analyzed by NMR. All solvents and chemicals used for experimental purposes were purchased from Merck (Germany).

### Cells and viruses

Peripheral Blood Mononuclear Cells (PBMCs) from five healthy volunteers who were seronegative for HIV, HCV, HBV and TB (approved by blood transfusion, Alzahra hospital, Isfahan, Iran) were separated on density gradient centrifugation (lymphodex). This study was approved by the Ethical Committee in Isfahan University, Iran. The PBMCs were grown in RPMI medium supplemented with 10% (v/v) heat inactivated Fetal Calf Serum (FCS; Gibco-BRL, Grand Island, NY, USA), 100 U/ml penicillin, 100 mg/ml streptomycin, 2 mM glutamine and 1 mM N-apyruvate and activated with 5 µg/ml phytohemagglutinin (PHA) and IL-2. All reagents were purchased from Gibco. Purified HIV-1 subtype A was obtained from Alzahra Hospital, Isfahan, Iran. Aliquots of  $6 \times 10^5$  cells per well were infected with HIV-1. Virus titers were measured by 50% cell culture infectious dose (TCID<sub>50</sub>) by end point dilution. The virus stocks with titers as high as  $6 \times 10^4$  infectious units/ml were obtained. The viruses were stored in medium containing dimethyl sulfoxide (DMSO) in liquid nitrogen (–70°C).

### Antiviral activity

Anti-HIV-1 activity of eight monofloral honey types and their fractions was studied via the HIV-1 P24 antigen kit. This kit is used to measure the amounts of HIV-1 Gag P24 antigen in cell culture medium. The PBMCs were grown on microtitre tissue culture plates. The cells were infected with 0.5 Multiplicity of Infection (MOI) HIV-1 and supplemented with different concentrations of monofloral honey types (100, 50, 10 and 5 µg/ml) and incubated at 37°C for 12 hours. Infected cells were washed and

overlaid with medium. DMSO (0.1%) and different concentrations of Zidovudine (AZT) (5, 2.5, 1, 0.1 and 0.01 µg/ml) were used as negative and positive controls respectively. After 72 hours of incubation, the overlay medium was used to detect and quantify HIV-1. At the end, the supernatant was transferred to the 96-well plate coated with HIV-1 P24 antigen (bioMérieux, France). The protocol was followed as described by the manufacturer, with absorbance measured at 450 nm. The antiviral activity of active fractions was further examined by different concentrations (5, 2.5, 1, 0.1 and 0.01 µg/ml).

### Human PBMC cytotoxicity assay

The PBMC cytotoxicity was estimated in the presence of eight monofloral honey types and active fractions using MTT assay [17]. Dilutions at concentrations of 10, 100, 1000 and 2000 µg/ml were added to PBMC ( $6 \times 10^5$  cell per well) and incubated at 37°C and 5% CO<sub>2</sub>. After 3 days of culture, 20 µl of MTT (0.5 mg/ml) was added to each well and incubated for 2 hours in the same condition. Then, 50 µl of PrOH/HCl/TX (0.04 MHCL/2 iPrOH/10% triton  $\times 100$ ) was separately added to each well and incubated for 6 hours. The optical density of cells was measured at 570 nm by micro plate spectrophotometer (Awareness Technology Inc, Stat fax 2100). Each concentration was tested three times. DMSO was used as the negative control.

### Analysis of CD4, CD3, CD45 and CD19 expression by flow-cytometry

The percentage of CD4, CD3, CD45 and CD19 T-lymphocyte subsets and their expression intensities on PBMCs in the presence of eight monofloral honeys and active fractions were evaluated by flow-cytometry.  $5 \times 10^6$  PBMCs were cultured in 24-well plates. After 72 h of incubation at 37°C, the cells were washed with PBS. Cells were separately incubated with saturating concentrations of PE anti human CD4, RPE CY5 anti human CD3, FITC anti human CD45 and FITC anti human CD19 monoclonal antibodies (Cyto Matin Gene, IRAN) for 20 min at 4°C. Lymphocytes were gated based on their forward and side scatter properties. At least, 10000 events were acquired for each sample. Each incubation was followed by two washing steps. The flow-cytometer was a FAC Scan from Becton Dickinson. Data acquisition were achieved using BD Cell Quest software.

### Quantitative real-time PCR assay for HIV-1

For real-time PCR, 200 µl of cell culture supernatant from each treated or untreated groups (virus control) were collected. RNA was extracted from 200 µl of each group of cells by High Pure Viral Nucleic acid kit (Roche Diagnostics, Meylan, France) according to a standard protocol. The quantification of HIV-1 RNA copies was carried out by real-time PCR assay. As previously described, forward primer NEC152 (5'-CCTCAA-TAAAGCTTGCCCTTGA-3'), reverse primer NEC131 (5'-GGCGCCACTGCTAGAGATTTT-3') and the dually labeled NEC-LTR probe (5'-6-carboxyfluorescein-AGTGTGTGCCCGTCTGTTRTKTGACT-6-carboxytetramethylrhodamine-3') in the long terminal repeat gene were used [18]. Primers and probes were synthesized by Metabion Co. (Germany). The master mix contained 1  $\times$  RNA master hybridization buffer, including the Tth DNA polymerase and deoxynucleoside triphosphate mix containing dATP, dCTP, dGTP, dTTP and dUTP, 2.5 Mn (OAC) 2, and 0.3 µM concentrations of each primer and probe. The quantitative real-time PCR conditions were as follows: initial reverse transcription at 61°C for 30 min, denaturation at 95°C for 30 s, and 45 cycles of denaturation at

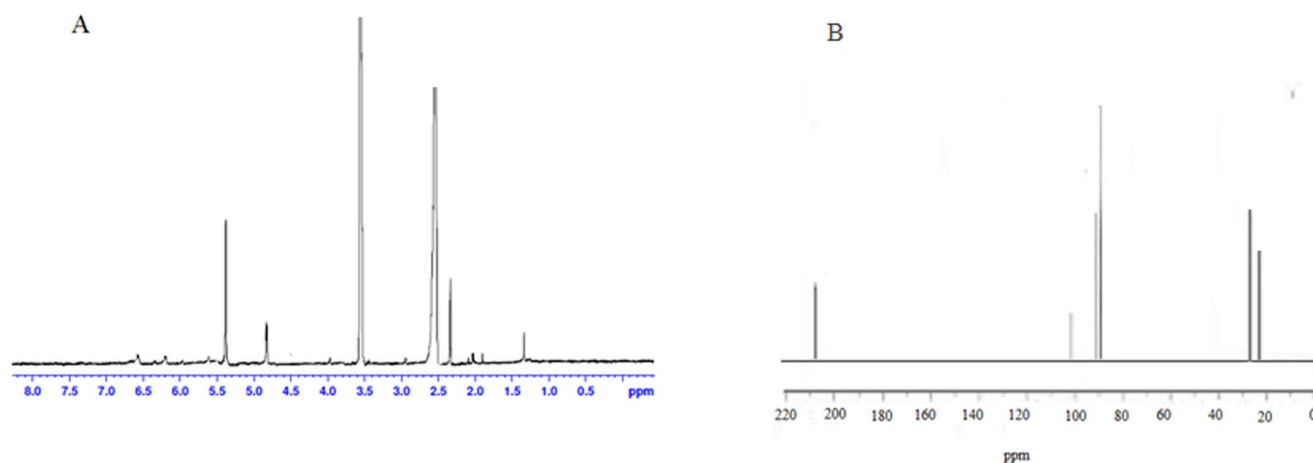

**Figure 1.  $^1\text{H}$  NMR (A) and  $^{13}\text{C}$  NMR (B) spectrum of methylglyoxal.** The NMR data present a mixture of mono- and dihydrate forms of methylglyoxal.

doi:10.1371/journal.pone.0108195.g001

95°C for 1 s, annealing at 55°C for 15 s and elongation at 65°C for 1 min with a ramp of 5°C/s (with fluorescence acquisition at the end of each elongation stage). The positive control was consisted of culture supernatant of the HIV-1. As a control for cross-contamination, a sample of distilled water was subjected to the RNA extraction procedure, and the resulting extract was amplified in duplicate [19].

#### Time of addition study

The time-of-addition experiment was carried out as described previously by Tao *et al.*, 2007 [20]. In brief, PBMCs,  $2 \times 10^5$  per well, were seeded into 24-well culture plates and incubated for 24 h. The cultures were treated with 0.5 MOI HIV-1 for 1 hour at 4°C to allow HIV-1 to attach the cells without fusion, and then washed three times with medium to remove unbound viruses. Active fraction and AZT at concentration of 5  $\mu\text{g}/\text{ml}$  were added at different time points (0, 2, 4, 6, 8, 12, 16, 24, and 32 hours post infection). After incubation at 37°C for 72 h, the reduction in the virus titer in the cell culture supernatants was measured by

quantitative real-time PCR assay and infection cultures containing the extracts were compared with that of the control cultures for each treatment.

#### Statistical analysis

The data represent the mean  $\pm$  SD from three independent experiments. The half-maximal cytotoxic concentration (CC<sub>50</sub>) and EC<sub>50</sub> values were estimated using regression line analysis in Microsoft Excel 2007. A selectivity index (SI) was used to determine the effectiveness of anti-HIV agents. SI was calculated as the ratio of CC<sub>50</sub> to EC<sub>50</sub>. The Analysis of Variance (ANOVA) was performed and a P value of  $<0.05$  was used as the measure of statistical significance between samples.

## Results

#### Spectroscopic analysis

Among the tested fractions, fractions 10, 12, 14 and 19 from *N. sativa*, *Z. mauritiana*, *P. sativum* and *Z. multiflora* were more

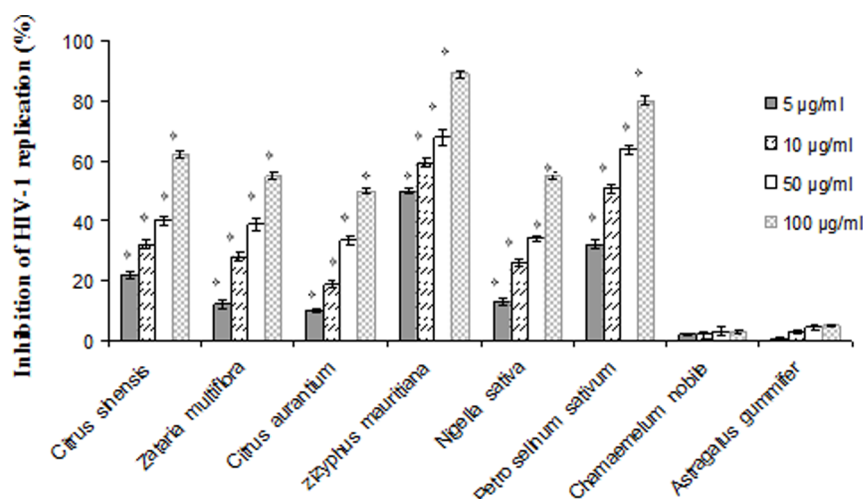

**Figure 2. Effect of eight monofloral Iranian honeys at different concentrations on HIV-1 replication.** The EC<sub>50</sub> of each extract was calculated using regression line. Each bar represents the mean  $\pm$  SD of three independent experiments. The stars indicate that the data are significantly different ( $p < 0.05$ ) from the untreated control.

doi:10.1371/journal.pone.0108195.g002

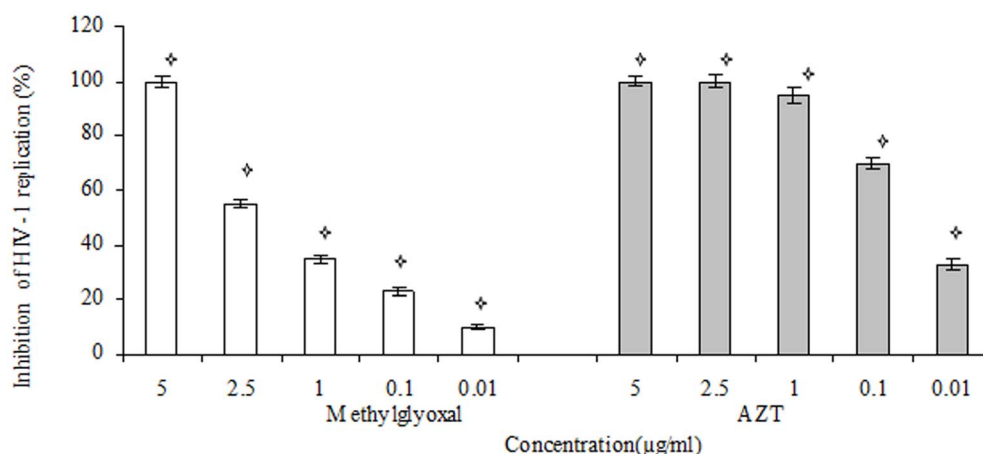

**Figure 3. Effect of Methylglyoxal and AZT on HIV-1 replication.** The  $EC_{50}$  of each extract was calculated using regression line. Each bar represents the mean  $\pm$  SD of three independent experiments. The stars indicate that the data are significantly different ( $p < 0.05$ ) from the untreated control.

doi:10.1371/journal.pone.0108195.g003

active to reduce the viral titer of HIV-1 DNA (data not shown). The NMR data of these fractions were compared with similar studies on methylglyoxal [21]. These fractions were determined by NMR as mono and dehydrated forms of methylglyoxal (Fig. 1).

**Methylglyoxal.**  $^1H$  NMR (400 MHz, DMSO)  $\delta$ : 2.33 (s, 3H, CH<sub>3</sub>), 1.35 (s, 3H, CH<sub>3</sub>), 5.4 (s, 1H, CH), 4.82 (s, 1H, CH).  $^{13}C$  NMR (300 MHz, DMSO)  $\delta$ : 24.1, 90.1, 187.1, 21.5, 97.1, 108.7 IR (KBr)  $\nu_{max}$ : 3089, 2936, 2870, 1719, 1710.

The percentage of the methylglyoxal fractions in mono-floral honey types from *N. sativa*, *Z. mauritiana*, *P. sativum* and *Z. multiflora* were 3.8, 7, 5.4 and 4.2 respectively.

#### Anti-HIV-1 activity

Results showed that six types of honey originated from *C. sinensis*, *Z. multiflora*, *C. aurantium*, *Z. mauritiana*, *N. sativa* and *P. sativum* flowers inhibited viral replication in a dose dependent

manner. Two honey types originated from *C. nobile* and *A. gummifer* flowers didn't have any antiviral effect. The effective concentrations of mono-floral honey types from *P. sativum*, *N. sativa*, *C. sinensis*, *Z. multiflora*, *C. aurantium* and *Z. mauritiana* flowers to reduce virus titers by 50% were 37.5, 88, 70, 88, 105 and 5  $\mu$ g/ml, respectively. Also the calculated SI for mono-floral honeys originated from *C. sinensis*, *Z. multiflora*, *C. aurantium*, *Z. mauritiana*, *N. sativa* and *P. sativum* flowers were 21.4, 22.72, 22.7, 350, 17.04 and 40 respectively (Fig. 2). Methylglyoxal showed anti-HIV-1 activity more than eight honey types with  $EC_{50}$  and SI values of 2.2 and 590  $\mu$ g/ml (Fig. 3).

#### Analysis of Human PBMC cytotoxicity assay

Cellular toxicity of eight monofloral honey types on PBMCs is shown in Figure 4. The results showed that all honey types increased PBMCs number in a dose dependent manner. All

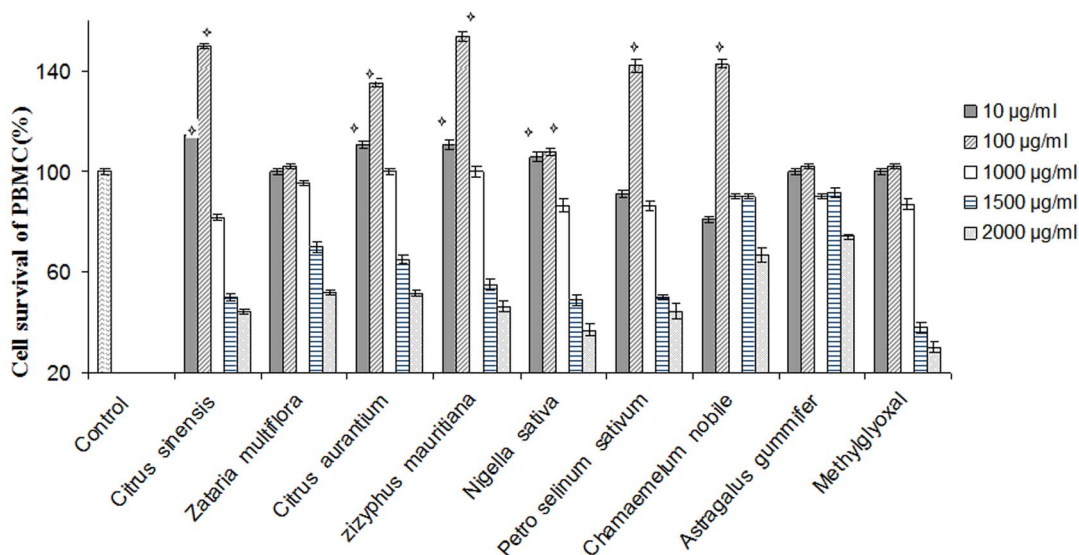

**Figure 4. Effect of eight monofloral Iranian honeys and methylglyoxal at different concentrations on PBMCs proliferation assay.** The cells treated with 0.1% DMSO were used as control. The stars indicate that the data are significantly different ( $p < 0.05$ ) from the untreated control.

doi:10.1371/journal.pone.0108195.g004

**Table 1.** The effects of eight monofloral honey types on frequency and the average mean fluorescent intensity (MFI) of CD4, CD3, CD45 and CD19 in PBMCs.

| Monofloral Honey             | CD4       |       | CD3       |        | CD45      |        | CD19      |       |
|------------------------------|-----------|-------|-----------|--------|-----------|--------|-----------|-------|
|                              | Frequency | MFI   | Frequency | MFI    | Frequency | MFI    | Frequency | MFI   |
| Control                      | 20.23     | 18.10 | 81.35     | 265.94 | 88.16     | 207.30 | 3.67      | 14.9  |
| <i>Citrus sinensis</i>       | 42.68     | 39.64 | 77.04     | 269.94 | 81.3      | 189.85 | 3.25      | 13.3  |
| <i>Zataria mmultiflora</i>   | 42.27     | 29.90 | 85        | 264    | 87.98     | 173.40 | 4.22      | 24.72 |
| <i>Citrus aurantium</i>      | 40.1      | 36.5  | 71.1      | 254.45 | 80.41     | 162.15 | 4.1       | 14.85 |
| <i>Zizyphus mauritiana</i>   | 40.54     | 40.39 | 79.36     | 300.54 | 87        | 202    | 3.6       | 12.1  |
| <i>Nigella sativa</i>        | 44.75     | 46.79 | 82        | 255.1  | 89.10     | 208.15 | 3.5       | 27.78 |
| <i>Petro selinum sativum</i> | 42.15     | 41.37 | 82.4      | 250.02 | 83.1      | 210.4  | 3.4       | 11.2  |
| <i>Chaemelum nobile</i>      | 38.5      | 36.8  | 80        | 251    | 83.5      | 208.4  | 3.41      | 14.1  |
| <i>Astragalus qummifer</i>   | 41.2      | 40.5  | 85        | 244    | 82.16     | 201.5  | 3.6       | 13.8  |
| <i>Methylglyoxal</i>         | 20.1      | 19.0  | 82.14     | 259.18 | 87.10     | 202.34 | 3.79      | 15.1  |

doi:10.1371/journal.pone.0108195.t001

samples increased PBMCs number up to 1.5 folds. The maximum proliferative effects of all samples were achieved at a concentration of 100 µg/ml. All extracts have a cytotoxic effect at higher concentrations. The result showed that CC50 values of all types were more than 1500 µg/ml. The CC50 values of eight monofloral honeys were obtained at concentrations of 1500, 2000, 2000, 1750, 1500, 1500, >2000 and >2000 µg/ml which were originated from *C. sinensis*, *Z. multiflora*, *C. aurantium*, *Z. mauritiana*, *N. sativa*, *P. sativum*, *C. nobile* and *A. gummifer* flowers respectively. Methylglyoxal didn't have any effect on lymphocyte proliferation up to 100 µg/ml and had cytotoxic effect at higher concentrations. The CC50 value of methylglyoxal was obtained at 1300 µg/ml.

### Effect of honey types on expression of CD4, CD3, CD45 and CD19

The effects of eight monofloral honey types on frequency and the average mean fluorescent intensity (MFI) of CD4+ T cells in PBMCs are summarized in Table 1. The results showed that all honey types at concentration of 100 µg/ml increased frequency of CD4+ T cells in PBMCs. The average MFI value of the entire cell population in cells treated with all eight types were also increased up to a ratio of two folds compared to control. The results also showed that all studied monofloral Iranian honeys didn't have any effect on the intensities of CD3 and CD45 markers. The average MFI value and frequency of CD+19 lymphocytes were increased for the cells treated with *Z. mmultiflora* and *N. sativa* compared to control (Table 1). Methylglyoxal didn't have any effect on the frequency and intensity of CD4, CD3, CD19 and CD45 markers.

### Time of addition study

A time-of-addition experiment was performed by measuring the HIV-1 RNA yields in the infected culture supernatants, by means of a real-time PCR assay. The inhibition of HIV-1 replication in cells treated with methylglyoxal was achieved when the extracts were added between 0 and 24 hours post-HIV infection. The amount of viral DNA in methylglyoxal treated cells dramatically decreased when it was added at 32 and 48 hours post-HIV infection. As a control, AZT, a reverse transcriptase inhibitor, showed higher anti-HIV-1 activity when added between 0 and 6 hours post-HIV infection (Fig. 5). These data suggest that methylglyoxal inhibits HIV-1 infection by targeting viral life cycle after reverse transcription activity.

### Discussion

These studies suggest that there is a striking correlation between anti-HIV-1 activity of Iranian honeys and floral sources. In the present study, mono-floral honeys originated from *P. sativum*, *N. sativa*, *C. sinensis*, *Z. mmultiflora*, *C. aurantium* and *Z. mauritiana* showed potential anti-HIV-1 activity while monofloral honeys originated from *A. gummifer* and *C. nobile* showed lower anti-HIV activity. These results can be attributed to the differences in the secondary compound profile which are dependent largely on the floral source of the honey. Some reports have demonstrated that the biological activities of the most important monofloral honeys are related to the phytochemical composition and different geographical origins [22,16]. Previously a correlation between the antioxidant activity of honey and proline content is reported. It suggests that honey amino acid content can play a role in its antioxidant activity [23]. The present results confirm the occurrence of methylglyoxal in monofloral Iranian honeys as a potent anti-HIV1 agent. The content of the methylglyoxal fraction in mono-floral honey from *Z. multiflora*

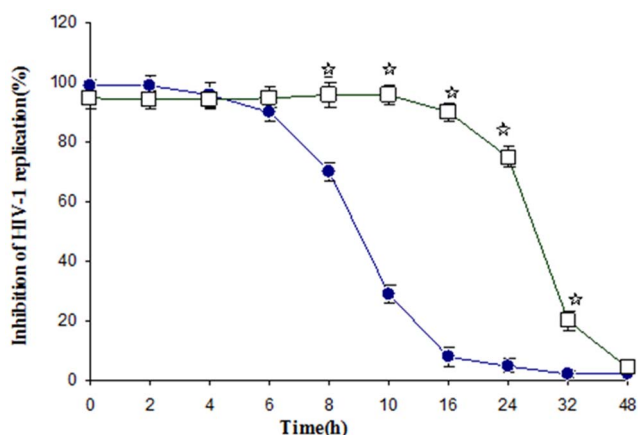

**Figure 5. Time of addition effect of methylglyoxal (□) and AZT (●) at concentration of 5 µg/ml on HIV-1 replication.** The extracts were added 0, 2, 4, 6, 8, 10, 16, 24, 32, 48 hours after virus infection. Each value is the result of mean  $\pm$  SD of three independent experiments. The stars indicate that the data are significantly different ( $p < 0.05$ ) from the untreated control. doi:10.1371/journal.pone.0108195.g005

was significantly more than mono-floral honey types from *N. sativa*, *Z. mauritiana* and *P. sativum*. Therefore, there is a relationship between anti-HIV-1 activity of mono-floral honey types and methylglyoxal level.

The anti-HIV-1 activity of methylglyoxal is distinguished here on the late stage of HIV infection and after reverse transcription. So, methylglyoxal may block assembly of new HIV virions and

maturation of the virus. The assembly of new HIV virions is the ultimate step of the viral cycle which begins at the plasma membrane of the host cell [24]. Some commercial drugs such as saquinavir, indinavir, ritonavir, nelfinavir, amprenavir, lopinavir, atazanavir and fosamprenavir have been reported to inhibit protease activity and maturation of the new virus [25]. However, this is the first time that an alpha-keto aldehyde has been shown to impact the late stage of virus replication. It may provide the basis for the design of inhibitors that target the late stage of the viral life cycle. The results also demonstrated that frequency and intensity of CD4 expression in PBMC increased in the presence of all honey types. However methylglyoxal didn't show any effect on the lymphocyte proliferation. According to the previous result, the honey products such as propolis and prophylaxis can increase interferon-gamma (IF gamma) serum level and ratio of CD4+: CD8+ T-cell [23]. In the present study, anti-HIV-1 activity of methylglyoxal was significantly more than eight honey types, giving the conclusion that methylglyoxal is potent constituent in honeys to suppress HIV-1 activity. Our data demonstrated that Iranian honey types with high concentration of methylglyoxal might be good candidates for preclinical evaluation of anti-HIV-1 therapies.

## Acknowledgments

The author would like to acknowledge the University of Isfahan for the financial support of this study.

## Author Contributions

Wrote the paper: MB.

## References

- Bessong PO, Obi CL (2006) Ethnopharmacology of human immunodeficiency virus in South Africa minireview. *J African of biotechnol* 5: 1693–1699.
- Little SJ, Frost SD, Wong JK, Smith DM, Pond SL (2008) Persistence of transmitted drug resistance among subjects with primary human immunodeficiency virus infection *Vir* 82: 5510–5518.
- Passaes CP, Sáez-Cirión A (2014) HIV cure research: Advances and prospects *Vir* 454: 340–352
- Cos P, Maes L, Vanden Berghe D, Hermans N, Pieters L, et al (2011) Plant substances as anti-HIV agents selected according to their putative mechanism of action. *Nat Prod* 67: 284–293.
- Yang J, Li L, Tan S, Jin H, Qiu J, et al (2012) A natural theaflavins preparation inhibits HIV-1 infection by targeting the entry step: Potential applications for preventing HIV-1 infection. *Fitoterapia* 83: 348–355.
- Singh IP, Bharate SB, Bhutani KK (2005) Anti-HIV natural products. *Curr Sci* 89: 269–91.
- Duke NC (1991) A systematic revision of the mangrove genus *Avicennia* (Avicenniaceae) in Australasia. *Aust Syst Aust Syst Bot* 4: 299–324.
- Xiaoling Li, Chan WK (1999) Transport, metabolism and elimination mechanisms of anti-HIV agents. *Advanced Drug Delivery Reviews Phytochem* 39: 81–103.
- Terrab A, Diez MJ, Heredia FJ (2002) Characterization of Moroccan unifloral honeys by their physicochemical characteristics. *Food Chem* 79: 373–379.
- Alvarez-Suarez JM, Tulipani S, Romandini S, Bertoli E (2010) Contribution of honey in nutrition and human health: a review. *Med J of Nutr Met* 3:15–23.
- Lusby PE, Coombes AL, Wilkinson JM (2005) Bactericidal activity of different honeys against pathogenic bacteria. *Arch Med Res* 36: 464–467.
- Grainger MNC, Manley-Harris M, Fauzi NAM, Farid MM (2014) Effect of high pressure processing on the conversion of dihydroxyacetone to methylglyoxal in New Zealand mānuka (*Leptospermum scoparium*) honey and models thereof, *Food Chemistry* 153, 15, 134–139
- Norman AR, Cicero B, Eloi SGM, Tariq MB, Patricia A, et al (2011) Insect natural products and processes: New treatments for human disease. *Insect Biochem and Mol Biol*, 41, 10, 747–769.
- Al-Waili NS, Al-Waili TN, Al-Waili AN, Saloom KS (2006) Influence of natural honey on biochemical and hematological variables in AIDS: a case study. *Sci World J* 2, 6, 1985–9.
- Mulu A, Diro E, Tekleclassie H, Belyhun Y, Anagaw B, et al (2010) Effect of Ethiopian multiflora honey on fluconazole-resistant *Candida* species isolated from the oral cavity of AIDS patients. *Int J STD AIDS* 21(11):741–5.
- Gheldof N, Engeseth NJ (2002) Antioxidant capacity of honeys from various floral sources based on the determination of oxygen radical absorbance capacity and inhibition of in vitro lipoprotein oxidation in human serum samples. *J Agri Food Chem* 50: 3050–3055.
- Morgan DM (1997) Tetrazolium (MTT) Assay for cellular viability and activity. *Polyamine Protocols* 79: 8–179.
- Rouet F, Ekouevi DK, Chaix ML, Burgard M, Inwoley A, et al (2005) Transfer and evaluation of an automated, low-cost real-time reverse transcription-PCR test for diagnosis and monitoring of human immunodeficiency virus type 1 infection in a West African resource-limited setting. *Clin Microbiol* 43: 2709–17.
- Legoff J, Boulhal H, Grésenguet G, Weiss H, Khonde N (2006) Real-Time PCR Quantification of Genital Shedding of Herpes Simplex Virus (HSV) and Human Immunodeficiency Virus (HIV) in Women Coinfected with HSV and HIV. *J Clin Microbiol* 44:423–32.
- Tao J, Hu QX, Yang J, Li RR, Li XY, et al (2007) *In vitro* anti-HIV and -HSV activity and safety of sodium rutin sulfate as a microbicide candidate. *Antiviral Res* 75:227–33.
- Donarski JA, Roberts DPT, Charlton AJ (2010) Quantitative NMR spectroscopy for the rapid measurement of methylglyoxal in manuka honey. *Anal Methods*, 2, 1479–1483
- Alvarez-Suarez JM, Tulipani S, Díaz D, Estevez Y, Romandini S, et al (2010). Antioxidant and antimicrobial capacity of several monofloral Cuban honeys and their correlation with color, polyphenol content and other chemical compounds. *Food Chem Toxicol* 48:2490–2499.
- Meda A, Lamien CE, Romito M, Millogo J, Nacoulma OG (2005) Determination of the total phenolic, flavonoid and proline contents in Burkina Fasan honey, as well as their radical scavenging activity. *Food Chem* 91: 571–577.
- Jayaraman S, Shah K (2008) Comparative studies on inhibitors of HIV protease: a target for drug design. *In Silico Biol* 8:427–447.
- Abdel Fattah NS, Nada OH (2007) Effect of propolis versus metronidazole and their combined use in a treatment of acute experimental giardiasis. *J Egypt Soc Parasitol* 37:691–710.
